1 **A Peer-Educator Driven Approach for Sampling Populations at Increased Mpox Risk in the**  
2 **Democratic Republic of the Congo: Implications for Surveillance and Response**

3  
4 Sydney Merritt<sup>1</sup>, Megan Halbrook<sup>1</sup>, Yvon Anta<sup>2</sup>, Patrick K. Mukadi<sup>2, 11</sup>, Emmanuel Hasivirwe  
5 Vakaniaki<sup>2</sup>, Tavia Bodisa-Matamu<sup>3</sup>, Lygie Lunyanga<sup>2</sup>, Cris Kacita<sup>4</sup>, Jean Paul Kompany<sup>2, 11</sup>, Jean-  
6 Claude Makangara-Cigolo<sup>2,5, 11</sup>, Michel Kenye<sup>2</sup>, Sifa Kavira<sup>2</sup>, Thierry Kalonji<sup>4</sup>, Sylvie Linsuke<sup>2</sup>,  
7 Emile Malembi<sup>4</sup>, Daniel Mukadi-Bamuleka<sup>3, 11</sup>, Liliane Sabi<sup>2</sup>, Candice Lemaille<sup>6</sup>, Inaka Marie<sup>7</sup>,  
8 Nicola Low<sup>8</sup>, Lisa E. Hensley<sup>9</sup>, Nicole A. Hoff<sup>1</sup>, Robert Shongo<sup>4</sup>, Jason Kindrachuk<sup>6,10</sup>, Anne W.  
9 Rimoin<sup>1</sup>, Placide Mbala-Kingebeni<sup>2,11</sup>

- 10  
11 1. Jonathan and Karin Fielding School of Public Health, Department of Epidemiology,  
12 University of California, Los Angeles, CA, USA  
13 2. Institut National de Recherche Biomedical (INRB), Department of Epidemiology and  
14 Global Health, Kinshasa, Kinshasa, Democratic Republic of the Congo  
15 3. Rodolphe Mérieux Institut National de Recherche Biomedicale Laboratory, Goma, North  
16 Kivu, Democratic Republic of the Congo  
17 4. National Program for Monkeypox and Viral Hemorrhagic Fevers, Ministry of Health,  
18 Kinshasa, Kinshasa, Democratic Republic of the Congo  
19 5. Graduate School for Cellular and Biomedical Sciences, University of Bern, Bern  
20 Switzerland  
21 6. Max Rady College of Medicine, Department of Medical Microbiology & Infectious  
22 Diseases, University of Manitoba, Winnipeg, MB, Canada  
23 7. National Program for HIV/AIDS, Ministry of Health, Kinshasa, Kinshasa, Democratic  
24 Republic of the Congo  
25 8. Institute of Social and Preventive Medicine, University of Bern, Bern, Switzerland  
26 9. Zoonotic and Emerging Disease Research Unit, National Bio and Agro-Defense Facility,  
27 Agricultural Research Service (ARS), United States Department of Agriculture (USDA),  
28 Manhattan, Kansas, USA.  
29 10. Department of Internal Medicine, University of Manitoba, Canada  
30 11. Service de Microbiologie, Département de Biologie Médicale, Cliniques Universitaires de  
31 Kinshasa, Université de Kinshasa

32 **Corresponding Author**

33 Anne W. Rimoin, PhD, MPH Professor, Department of Epidemiology, Gordon-Levin Endowed  
34 Chair in Infectious Diseases and Public Health

35 UCLA Fielding School of Public Health, 650 Charles E. Young Dr, CHS 41-275, Los Angeles, CA  
36 90095, USA; arimoin@ucla.edu [ORCID : 0000-0002-0662-9067]

37  
38  
39  
40

41 **ABSTRACT** (word count = 247)

42

43 The epidemiological risk factors associated with mpox acquisition and severity in the Democratic  
44 Republic of the Congo (DRC) are changing. We assessed perceived mpox risk, and behavioral,  
45 clinical and sexual histories among key populations at risk of acquisition through sexual contact.  
46 Here, we describe a sampling strategy to enroll participants considered to be at increased risk for  
47 mpox infection - men who have sex with men (MSM) and sex workers (SW) - in three urban  
48 centers in the DRC. Through the combined approach of time-location sampling with peer  
49 educators and respondent-driven sampling, a mixed cohort of 2826 individuals including self-  
50 identified MSM (n = 850), SW (n = 815), both MSM and SW (n = 118) and non-MSM, non-SW  
51 individuals (n = 1043) was enrolled in Kinshasa, Kinshasa province, Kenge, Kwango province,  
52 and Goma, North Kivu province, from March-August 2024. Of these, over 90% were reached  
53 through peer educators. The odds of sampling SW individuals were higher at bars/clubs than  
54 traditional health facilities. Conversely, the odds of enrolling MSM were highest at selected health  
55 facilities. Modifications to the sampling approach were introduced in Kenge and Goma, but these  
56 did not affect the enrollment of MSM or SW participants. Ultimately, the selection of, and  
57 collaboration with, well-integrated peer educators was the most important facet of this sampling  
58 strategy. As the definitions of at-risk populations continue to change for mpox, we demonstrate a  
59 functional approach to quickly surveying otherwise hard-to-reach groups for both public health  
60 surveillance activities and response.

61

62

63 **KEYWORDS:** Mpox; MPXV; Democratic Republic of the Congo; Clade I; at-risk populations;  
64 sampling strategies

65

66

## 67 INTRODUCTION

68 The Democratic Republic of the Congo (DRC) was the first country to report human mpox in 1970  
69 and has since experienced the greatest historic burden of the disease. Since 2023, a rapid  
70 increase in mpox cases associated with Clade I monkeypox virus (MPXV) in the DRC has been  
71 reported, along with geographic expansion within and beyond the country's borders, including  
72 areas previously unaffected by the disease. These events prompted the Africa Center for Disease  
73 Control to declare its first public health emergency of continental security and the World Health  
74 Organization (WHO) to declare the second public health emergency of international concern for  
75 mpox (1, 2).

76 Viral genome sequencing has demonstrated that APOBEC3 mutations in confirmed mpox cases  
77 are correlated with these changing transmission patterns (3-5). As a result, subdivision of Clade I  
78 monkeypox virus (MPXV) into Clade Ia (mainly associated with zoonotic transmission) and Clade  
79 Ib (associated with sustained human-to-human transmission) have been proposed (3, 6). Most  
80 mpox cases in DRC have been mediated primarily through zoonotic transmission of Clade Ia  
81 MPXV, with rodents suspected as the primary reservoir. However, the emergence of Clade Ib  
82 MPXV has complicated the ongoing public health emergencies due to more sustained human-to-  
83 human transmission involving close sexual and non-sexual contacts. This has included cases  
84 concentrated within vulnerable populations including sex workers (SW) in eastern DRC (3) as well  
85 as sustained transmission via sexual contact among men who have sex with men (MSM) (7).  
86 Geographic expansion of mpox cases to urban centers has also been documented, with instances  
87 of transmission through sexual contact, including linkages to sex work. Historically, the greatest  
88 mpox morbidity and mortality in DRC have been observed in children < 15 years old, while over  
89 90% of Clade IIb mpox infections during the 2022 global outbreak were linked to dense sexual  
90 networks, and predominantly among adult males who self-identify as MSM (8). However, the

91 changing patterns of transmission suggest that male and female SW as well as MSM are at  
92 increased risk for infection in the DRC.

93 Sex between men and sex work are not illegal in DRC, but discriminatory regulations and socio-  
94 cultural stigma persist, complicating access to these populations and necessitating enhanced  
95 sensitivity in outreach and research initiatives (9, 10). National health programs such as the  
96 National Program to Control HIV/AIDS and Sexually Transmitted Infections (Programme National  
97 de Lutte contre le SIDA; PNLS) include sexually diverse populations in their programming, yet  
98 MSM and SW populations are still considered hidden populations in the DRC as there are few  
99 demographic data and limited sampling frameworks to reach communities these communities (9,  
100 11). To address these challenges, alternative sampling approaches, such as respondent-driven  
101 (RDS) and time-location sampling (TLS), have been proven effective in similar resource limited  
102 settings. These approaches have been designed to sample and survey “key populations” who  
103 are vulnerable to HIV (12), who face additional barriers in accessing health services, and are  
104 otherwise difficult to access (13-15).

105 Following the 2022 global mpox outbreak, which predominantly spread through sexual contact  
106 and disproportionately affected MSM, as well as the documentation of Clade I MPXV transmission  
107 through sexual contact in multiple provinces in DRC (7, 16), we sought to survey increasingly at-  
108 risk key populations—MSM and SW—using a modified time-location and respondent-driven  
109 sampling approach (17).

## 110 **METHODS**

111 There is no explicit sampling frame for MSM and SW in the DRC (12). Populations of interest  
112 included the following groups: MSM, SW, and a non-MSM, non-SW general population  
113 considered at-risk populations (ARP) members at selected venues. ARP members were  
114 considered to be at a greater risk than the general DRC population as a whole as they were

115 encountered at locations (such as city entry points, migration centers) and held occupations (such  
116 as those at the animal-human interface) where the risk of mpox was thought to be higher than  
117 average. Inclusion criteria were adults over 18-years-old; who identified themselves as either men  
118 who had ever reported sex with men (regardless of their sexual orientation); participating in sex  
119 work; or part of an ARP who voluntary agreement to participate in sampling at selected venues.  
120 Participants were excluded from the study if they did not consent to provide a blood sample at the  
121 time of interview. Participants were enrolled at sites in three different geographic locations—  
122 Kinshasa, Kinshasa Province, Kenge, Kwango Province, and Goma, North Kivu Province. We  
123 defined these as “urban centers” due to their high population density, which differs from the rural  
124 forested communities, which are more typical mpox transmission sites in the DRC (18).

125 This sampling approach included six distinct venue types for sampling: bars/cubs, farms or  
126 abattoirs, markets, key transition points or points of entry, private residences, and health facilities,  
127 including those more accepting for MSM and SW populations. Upon sampling, if the venue did  
128 not fall under one of these classifications, it was listed as “other”. Sites were specifically selected  
129 in neighborhoods in health zones with known-MSM and SW populations as well as ARPs. In  
130 Kinshasa, sites from twelve health zones were included: Gombe, Lingwala, Limete, Kasa-Vubu,  
131 Kalamu 1, Kalamu 2, Lemba, Masina 1, Masina 2, Mont Ngafula 1, Kokolo and Nsele. In Goma,  
132 sites from three health zones were included: Goma, Karisimbi and Nyirangongo. In Kenge, only  
133 sites in the Kenge health zone were included.

#### 134 *Role of Peer Educators*

135 In March 2024, we recruited and trained peer educators (PEs) who self-identified as members of  
136 either MSM or SW populations to direct the community-based enrollment and enroll as “seeds”  
137 for our referral-based enrollment strategy. PEs were essential in selecting those venues for TLS  
138 as well as recruiting community members through RDS. RDS via PE included the distribution

139 recruitment coupons were labeled such that participants could be linked to the PE recruiter. No  
140 financial incentives were provided for PEs to enroll their peers, yet they were paid an hourly wage  
141 and provided with communication credits to contact participants via mobile phones. PEs were  
142 invaluable resources in the selection of the sampling locations and sensitization of target  
143 populations before arrival of the interviewing team. PEs helped to both select TLS venues and  
144 seed beginnings of RDS sampling chains – PEs were involved in all aspects of initial participant  
145 enrollment.

#### 146 *Time Location Sampling*

147 The selected sampling method is a flexible, hybrid approach which includes both TLS and RDS  
148 to enroll participants for research studies (**Figure 1**) (17). In collaboration with the PNLS, PEs and  
149 their established connections with at-risk communities in Kinshasa, Kenge and Goma, we  
150 selected specific venues known to be frequented by target groups. These locations included  
151 health facilities with specialized care for MSM and SW populations, as well as social venues such  
152 as local bars and nightclubs with MSM and SW clientele and key migration points, markets and  
153 facilities at the animal-human interface. Sampling at these locations was conducted on a weekly  
154 basis at varying times to best recruit and enroll participants - nightlife hotspots were specifically  
155 targeted after work hours, to coincide with the most popular hours of operation.

#### 156 **[Figure 1]**

#### 157 *Respondent-Driven Sampling*

158 The study used referral coupons to provide information on how a participant was recruited, either  
159 by a peer educator (the initial seed) or another participant, although referral coupons were not  
160 required to enroll in the study thus this was a third option. The coupon included information on  
161 the study and contact details for the study coordinator, as well as a link to the WHO factsheets on  
162 mpox transmission and prevention (in French). On the back of the cards, there was a unique

163 barcode – which indicated how the person was referred and were scanned into the survey at the  
164 time of enrollment. Typically, if the person was referred by a peer educator, they would be enrolled  
165 at the same time/date and location that they were approached as the study team would already  
166 be there or at an organized time/location set by the peer educator. If the person was referred by  
167 another participant, they would either enroll on the same date or call the study team to find out  
168 the study locations. Upon enrollment at all locations, participants were asked to provide their  
169 referral coupon, if available. Following completion of a tablet-based survey, interviewers  
170 distributed five referral coupons per participant. Participants were not restricted in who they could  
171 share coupons with, but it was assumed most would be shared within their same population of  
172 interest.

### 173 *At-risk population enrollment*

174 Using similar methods to the MSM and SW population enrollment procedures, ARPs were  
175 enrolled at locations considered high risk. At each location, the team would work with a key  
176 informant to participate in recruitment of participants – similar to the peer educators in other  
177 locations. All potential participants in the ARP were given referral coupons from key informants  
178 as well as participant coupons following study completion. All enrolled persons received the same  
179 reimbursement within each province.

### 180 *Questionnaire Administration and Sample Collection*

181 Trained interviewers interviewed all participants in French or their preferred local language  
182 including Lingala, Kikongo and Swahili after obtaining consent. The electronic survey was hosted  
183 on a secure survey platform server (SurveyCTO. (2023). *SurveyCTO* (Version 2.0) [Computer  
184 software]. Dobility, Inc.). Questionnaire modules included questions related to sexual histories,  
185 self-identification of sexual and gender identity, including the ability when asked to define their  
186 gender, respondents were given a “select multiple” option, knowledge of mpox, zoonotic and

187 sexual risk factors, clinical symptom history, and general demographic information. Before the  
188 interview, a trained phlebotomist at the location took a 9ml venous blood sample in a serum tube  
189 and EDTA tube for aliquots of serum, plasma and buffy coat that were stored at -80C for future  
190 testing. Post-collection, the interviewer gave the participant a small transportation reimbursement  
191 (less than USD3), lubricant, and condoms.

## 192 *Data Analysis*

193 Datasets from each urban center were merged to create one complete dataset that was then  
194 cleaned and used for additional variable generation. Frequency distributions were calculated for  
195 key variables (demographic characteristics, classification as specific populations such as MSM,  
196 SW or ARP). Odds ratios were calculated to assess the likelihood of recruiting the target  
197 populations at specific venues; “health facility” was set as the reference group as these sites are  
198 considered the standard for population serosurveillance recruitment. Kinshasa was solely  
199 selected for this model due to the central sampling modification employed in Kenge and Goma.  
200 An interaction model joint test was run to assess the interaction between venue type and urban  
201 center. All cleaning and analysis were completed in SAS version 9.4 (SAS Institute, Cary, NC).

## 202 *Ethical Considerations*

203 This study was approved by the Institutional Review Boards of the University of California, Los  
204 Angeles (IRB#23-000676), University of Manitoba (HS25837) and the Kinshasa School of Public  
205 Health, University of Kinshasa, DRC (ESP/CE/161/2024). All participants were provided with an  
206 informed consent form which was signed or marked in agreement before commencing any study  
207 activities. Participant enrollment was conducted from March 20, 2024 to August 25, 2024.

208

## 209 **RESULTS**



210 PEs was the most frequent sampling method, with 96.8%, 99.6% and 98.3% of MSM, SW and  
211 MSMSW, respectively enrolled using this approach. PEs almost exclusively recruited all  
212 participants - no matter their classification - in Goma (99.1%) and Kenge (98.1%). Convenience  
213 sampling was most frequently used among the ARP sample (6.1%) overall and accounted for  
214 17.6% of ARP respondents enrolled in Kinshasa, with 17.6% recruited at the venues themselves.  
215 While all participants were provided with five recommendation coupons to seed RDS sampling,  
216 only 15 total respondents (0.5%) were recruited using this method (**Table 1**).

#### 217 **[Table 1]**

218 Through this modified sampling approach of TLS, peer-educator and respondent-seeded RDS,  
219 and convenience sampling of ARP, we enrolled 2,826 participants in Kinshasa (n = 940), Kenge  
220 (n = 966) and Goma (n = 920) between March and August 2024.

221 Of these participants, 850 (30.1%) self-identified as MSM, and 815 (28.8%) self-reported as SW  
222 (either as a primary or secondary occupation) (**Table 2**). Notably, MSM and SW classifications  
223 were not mutually exclusive, with 118 respondents (4.2%) identifying as both MSM and SW  
224 (MSMSW). Additionally, 1043 participants enrolled were considered part of the general ARP and  
225 did not report being an MSM or SW. Most respondents were single (78.6%) and had completed  
226 secondary school (42.1%). All respondents reported Kinshasa, Kwango, or North Kivu as their  
227 province of residence, apart from one individual (Equateur), indicating that this approach had  
228 been successful in specifically targeting urban populations.

#### 229 **[Table 2]**

230 We assessed how gender and sexual orientation classifications are understood and the  
231 intersection of these self-reported identities (Table 2). No respondents self-identified as queer,  
232 intersex or asexual. of note, 2.4% of respondents selected both male/man and female/woman  
233 simultaneously (n = 48) or responded with other sex-gender combinations that are incompatible  
234 with current definitions (**Table 3**) (19). When dichotomized by sex at birth, male-at-birth

235 respondents reported more sexual orientation diversity than persons responding female-at-birth.  
236 Among male respondents, 42.1% identified as straight across all genders. Moreover, 39.4% of  
237 male-at-birth respondents self-identified as gay and 18.4% as bisexual. Among MSM-only  
238 (defined as male at birth and reporting having sex with men,  $n = 850$ ), 59.8% of respondents  
239 identified as gay, 31.6% as bisexual and the remaining 8.6% identified as straight. Those not  
240 classified as MSM overwhelmingly identified as straight (98.8%). Among SW ( $n = 815$ ), 98.3% of  
241 respondents (both male and female) identified as straight. Of the MSMSW population ( $n = 118$ ),  
242 81.4% identified as gay and 12.7% as bisexual.

### 243 **[Table 3]**

244 In assessing whether the city of enrollment had an impact on the likelihood of sampling for each  
245 population, interaction model joint tests were significant for MSM ( $p < 0.001$ ) and MSM/SW  
246 ( $p < 0.001$ ), but not SW or ARP ( $p = 0.67$  and  $0.097$ ), thus indicating that the role of site type in  
247 determining the likelihood of MSM sampling is influenced by urban center of recruitment.

248 Kinshasa sampling was well distributed across site types, but in both Kenge and Goma, study  
249 participants were overwhelmingly sampled at one central location (**Table 4**). In Goma, sampling  
250 was almost exclusively conducted at an “other” facility (88.8%) - the Institut National de  
251 Recherche Biomedical, Goma (INRB-Goma). While not a PE selected location, nor a traditional  
252 TLS venue for sampling, the INRB-Goma was selected as a central hub for referral of respondents  
253 by PE at the selected sites or other participants in response to the ongoing insecurity in the North  
254 Kivu region and to ensure safety of staff and participants. PEs referred participants either in  
255 person, or via phone calls to known contacts in the community. In Kenge, 97.0% of all respondents  
256 were enrolled at a “centre convivial”, a facility with known openness to MSM and SW. Much like  
257 the INRB-Goma, one specific facility was selected as a focal point to which all recruited  
258 participants were directed. While insecurity is not as great a concern in Kwango province, the

259 central site modification to the sampling approach was chosen to ensure safety of participants  
260 who may be targeted due to their MSM or SW identity.

261 **[Table 4]**

262 When looking at the models of the association between venue of sampling and likelihood of  
263 recruiting target populations in Kinshasa, the odds of sampling MSM at a bar/club were 1.7 times  
264 lower than at a health facility. Using the same parameters, the unadjusted odds of sampling a SW  
265 at a bar/club in Kinshasa were 2.8 times higher than at a health facility. MSMSW were similarly  
266 2.4 times less likely to be sampled at a bar/club, and 5.8 times less likely at a private residence  
267 than a health facility (**Table 5**). The odds of sampling general population members were greatest  
268 at locations denoted as “private residences” (2.7 times higher than at health facilities).  
269 Farm/animal care responses were not included in the model due to low cell counts.

270 **[Table 5]**

271 **DISCUSSION**

272 In this study, we sampled and enrolled so-called hidden populations, potentially at high risk of  
273 acquiring MPXV through sexual contact, in three urban centers in the DRC. Overall, the most  
274 effective recruitment strategy was via well-integrated peer educators for MSM and SW target  
275 populations. The success of this approach mirrors past HIV-centered care delivery approaches  
276 through peer-driven recruitment in similar contexts (20). However, beyond sampling success, we  
277 show how, while peer-educators are central to enrollment, sampling venues also play a significant  
278 role in sampling likelihood by population type. Additionally, this study expands upon the MSM and  
279 SW specific sampling to include general population members considered at higher risk for mpox  
280 – a group that has not historically been included in HIV-related MSM and SW population  
281 sensitization and sampling (20, 21). Here, we show how a peer-educator driven sampling  
282 approach is effective in reaching more than just MSM and SW, but other at-risk groups for mpox,  
283 or other diseases transmitted through sexual contact.

284 In all three locations, RDS sampling accounted for less than 2% of recruited participants.  
285 Traditionally, RDS sampling relies on incentives for both recruitment and participation (11) - this  
286 may account for the low reported RDS-recruitment. TLS was specifically successful in recruiting  
287 SW populations. In Kinshasa, the odds of recruiting SW were consistently higher in selected  
288 bar/clubs than a traditional health facility. The opposite was found for MSM, where the odds of  
289 sampling this at-risk population were higher at selected health facilities. This finding may be  
290 explained by the specific targeting of facilities known as “centres conviviaux”, or those with known  
291 tolerance and acceptance of MSM patients. Additionally, these differences observed between  
292 MSM and SW recruitment may be attributed to greater socio-cultural stigma for MSM, while SW  
293 is an accepted profession in the DRC cultural context (22) .

294 While both MSM and SW populations were successfully recruited in Goma and Kenge, the  
295 implementation of the sampling approach was drastically different from that used in Kinshasa.  
296 This reliance on PE recruitment may be attributed to the sampling modifications employed in  
297 Goma due to security considerations. Additionally, this may highlight gaps in interviewer training—  
298 the coupons provided may have not been well explained, or without any incentive, participants  
299 may have been less likely to recruit their peers. Yet again, this emphasizes how PEs, even  
300 through phone-contact, are essential to this sampling approach. In Kenge, similarly almost all  
301 respondents were recruited via PE contact (98.1%) and directed to sampling at a set health  
302 center.

303 The sampling strategy employed in this study was heavily influenced by, and reliant on, peer  
304 educators recruited specifically for their connections to the populations of interest. In using PEs  
305 for their selection of recruitment venues, as well as their social links to MSM and SW, this  
306 sampling design is inherently biased towards successful recruitment by PEs. However, due to the  
307 need for rapid data collection, this type of survey is an important mechanism for reaching broad  
308 at-risk populations in settings like the DRC.

309 In a larger low-resource context, public health measures and interventions for these groups  
310 should also be developed in conjunction with the groups with which they seek to serve. For  
311 example, by integrating peer educators in the study design and implementation, this approach  
312 was successful in recruiting both SW and MSM. Community engagement was a central pillar of  
313 this study design - the value of well-integrated PEs should be underscored not only through peer  
314 recruitment but also through the guided selection of MSM and SW-centered health facilities and  
315 venues. Selected health facilities in Kinshasa may have been the best venue for recruiting MSM  
316 as they are known to the community as MSM-accepting.

317 One key aspect of this sampling strategy was defining at-risk populations. Due to the evolving  
318 nature of MPXV transmission, MSM and sexually diverse populations were of particular interest  
319 for sampling, yet this sensitive information is not readily available. Furthermore, this information  
320 may also not be readily shared with interviewers and members outside of the “hidden” population  
321 due to fear of persecution. For example, as of June 2024, a new bill has been proposed in DRC  
322 which specifically condemns homosexuality and suggests arresting or fining members of these  
323 communities (23).

324 While all interviews were conducted by health-trained professionals, self-reported sex at birth and  
325 gender responses were not always compatible with typical definitions of these identifiers (**Table**  
326 **2**). For example, several respondents reported “male at birth” but also “transgender male”.  
327 Additionally, when asked to define their sexual orientation, responses “queer”, “intersex” and  
328 “asexual” were never selected, indicating that these terms may either be misunderstood or not  
329 used in the DRC context and likely need further piloting to ensure correct terms are being used.  
330 Understanding of gender may be linked to socioeconomic status or influenced by cultural or  
331 religious contexts. Additionally, given these differing classifications of sex and gender, the MSM  
332 population was defined in this context by those respondents who were male at birth. In DRC,  
333 gender affirming surgery and hormone therapy are not readily available, thus, those respondents

334 who identified as transgender are not likely reflecting biological status but rather a preferred  
335 gender expression. These varying responses of gender and sexual orientation highlight  
336 differences in interpretations or potential alternative terms that may be used to best define these  
337 populations. As an already hidden population, ascertaining this information is invaluable for  
338 expanding definitions of populations who may be at risk for mpox and crafting public health  
339 interventions.

340 One drawback to this sampling approach was the overlap of individuals who were both classified  
341 as MSM and SW. Specifically, of 4.2% of respondents (n = 118) identified as MSM and reported  
342 sex work as their primary or secondary occupation. This subset of the population is of particular  
343 interest for mpox investigation due to potential interacting risk factors. In future analyses including  
344 serologic evaluation and establishment of additional mpox risk factors among these communities,  
345 these 118 individuals may be assessed separately to better understand MSM and SW-specific  
346 risk activities and the role of compound risk. Additionally, another limitation of this approach was  
347 lack of venue-specific details to identify where exactly sampling occurred. Specific names of  
348 venues were not collected so as to protect the exact whereabouts of these otherwise hard-to-  
349 reach populations, yet without this granular information, it is impossible to determine if certain  
350 sites were more influential in driving sampling success.

351 Ultimately, the primary objective of this study was to access and sample key populations to  
352 determine if there was evidence of mpox circulation across the DRC. Here, we highlight the peer-  
353 educator driven approach as an appropriate strategy for effectively reaching hidden MSM, SW  
354 and ARP populations of three urban centers in DRC, largely through the channels of well-  
355 integrated peer educators. Given the planned mpox vaccine deployment in DRC in autumn 2024  
356 for at-risk populations, this approach could be expanded to assess general acceptability of mpox  
357 vaccines, and other mpox-related interventions. Furthermore, the larger risk factor data and

358 serum samples collected from these 2826 individuals will be analyzed to ascertain perceived  
359 mpox risk, and anti-MPXV seroprevalence among these groups.

360 By accessing these key populations, these approaches could also be used to tailor mpox-  
361 prevention and educational strategies. However, when surveying these groups, recruitment and  
362 questionnaire material should be framed so as not to additionally discriminate against already  
363 stigmatized populations - public health messaging and action should account for *why* these  
364 populations are considered hidden. While used for surveillance, this sampling strategy also has  
365 implications for ongoing mpox research and response in DRC and similar low-resource contexts  
366 where the disease is endemic.

367

## 368 **ACKNOWLEDGEMENTS**

369 We would like to acknowledge the support of our IMReC collaborators including: Muge Cevik,  
370 Souradet Shaw, Issac Bogoch and Gregg Gonsalves in the creation of this study. We would also  
371 like to acknowledge the peer educators in Kinshasa, Kenge, and Goma who worked to recruit  
372 these hidden populations. Without their involvement, this work would not have been possible.  
373 Figures for this manuscript were created using Biorender.com.

374

## 375 **FUNDING**

376 This work was supported by the United States Department for Agriculture (USDA) Agriculture  
377 Research Service (ARS) (USDA ARS NACA number 20230048, grant number 58-3022-2-020)  
378 and by the International Mpox Research Consortium (IMReC) through funding from the Canadian  
379 Institutes of Health Research and International Development Research Centre (grant no. MRR-  
380 184813). These findings do not represent official views or endorsements of the United States or  
381 Canadian governments.

382

383 **DATA SHARING**

384 Protocols and questionnaires used in this study can be shared upon reasonable request to the  
385 authors.

386

387 **REFERENCES**

388

- 389 1. AfricaCDC. Africa CDC Declares Mpox A Public Health Emergency of Continental  
390 Security, Mobilizing Resources Across the Continent. Africa Centers for Disease Control  
391 (AfricaCDC); 2024.
- 392 2. Team WM. WHO Director-General declares mpox outbreak a public health emergency of  
393 international concern. In: (WHO) WHO, editor.; 2024.
- 394 3. Vakaniaki EH, Kacita C, Kinganda-Lusamaki E, O'Toole Á, Wawina-Bokalanga T, Mukadi-  
395 Bamuleka D, et al. Sustained human outbreak of a new MPXV clade I lineage in eastern  
396 Democratic Republic of the Congo. *Nat Med*. 2024 Jun 13.
- 397 4. O'Toole Á, Neher RA, Ndodo N, Borges V, Gannon B, Gomes JP, et al. APOBEC3  
398 deaminase editing in mpox virus as evidence for sustained human transmission since at least  
399 2016. *Science*. 2023 Nov 3;382(6670):595-600.
- 400 5. Ndodo N, Ashcroft J, Lewandowski K, Yinka-Ogunleye A, Chukwu C, Ahmad A, et al.  
401 Distinct monkeypox virus lineages co-circulating in humans before 2022. *Nat Med*. 2023  
402 Sep;29(9):2317-24.
- 403 6. Kinganda-Lusamaki E, Amuri-Aziza A, Fernandez N, Makangara-Cigolo J-C, Pratt C,  
404 Hasivirwe Vakaniaki E, et al. Clade I Mpox virus genomic diversity in the Democratic Republic of  
405 the Congo, 2018-2024: Predominance of Zoonotic Transmission. *medRxiv*. 2024:2024.08.  
406 13.24311951.
- 407 7. Kibungu EM, Vakaniaki EH, Kinganda-Lusamaki E, Kalonji-Mukendi T, Pukuta E, Hoff NA,  
408 et al. Clade I-Associated Mpox Cases Associated with Sexual Contact, the Democratic Republic  
409 of the Congo. *Emerg Infect Dis*. 2024 Jan;30(1):172-6.
- 410 8. 2022-24 Mpox (Monkeypox) Outbreak: Global Trends. Geneva: World Health  
411 Organization; 2024.
- 412 9. Yekeye I. Inclusive Governance Initiative: Democratic Republic of the Congo Baseline  
413 Report: United Nations Development Programme (UNDP); 2022.
- 414 10. REPUBLIQUE DEMOCRATIQUE DU CONGO: L'homosexualité Bruxelles:  
415 COMMISSARIAT GÉNÉRAL AUX RÉFUGIÉS ET AUX APATRIDES 2021.
- 416 11. Heckathorn DD. Respondent-driven sampling: a new approach to the study of hidden  
417 populations. *Social problems*. 1997;44(2):174-99.
- 418 12. Key Populations. *Topics* 2024 [cited 2024 10 Sep]; Available from:  
419 <https://www.unaids.org/en/topic/key-populations>
- 420 13. Kim BJ, Johnston LG, Grigoryan T, Papoyan A, Grigoryan S, McLaughlin KR. Hidden  
421 population size estimation and diagnostics using two respondent-driven samples with applications  
422 in Armenia. *Biom J*. 2023 Jun;65(5):e2200136.
- 423 14. Pines HA, Semple SJ, Magis-Rodríguez C, Harvey-Vera A, Strathdee SA, Patrick R, et al.  
424 A comparison of the effectiveness of respondent-driven and venue-based sampling for identifying  
425 undiagnosed HIV infection among cisgender men who have sex with men and transgender  
426 women in Tijuana, Mexico. *J Int AIDS Soc*. 2021 Mar;24(3):e25688.



- 427 15. Zhao J, Cai R, Chen L, Cai W, Yang Z, Richardus JH, et al. A comparison between  
428 respondent-driven sampling and time-location sampling among men who have sex with men in  
429 Shenzhen, China. *Arch Sex Behav*. 2015 Oct;44(7):2055-65.
- 430 16. Katoto PD, Muttamba W, Bahizire E, Malembaka EB, Bosa HK, Kazadi DM, et al. Shifting  
431 transmission patterns of human mpox in South Kivu, DR Congo. *The Lancet Infectious Diseases*.  
432 2024;24(6):e354-e5.
- 433 17. Raymond HF, Chen YH, McFarland W. "Starfish Sampling": a Novel, Hybrid Approach to  
434 Recruiting Hidden Populations. *J Urban Health*. 2019 Feb;96(1):55-62.
- 435 18. Beer EM, Rao VB. A systematic review of the epidemiology of human monkeypox  
436 outbreaks and implications for outbreak strategy. *PLoS Negl Trop Dis*. 2019  
437 Oct;13(10):e0007791.
- 438 19. National Academies of Sciences E, and Medicine; Division of Behavioral and Social  
439 Sciences and Education; Committee on National Statistics; Committee on Measuring Sex,  
440 Gender Identity, and Sexual Orientation. *Measuring Sex, Gender Identity, and Sexual Orientation*.  
441 In: Becker T CM, Bates N, editor. Washington (DC): National Academies Press (US); 2022.
- 442 20. Mulongo S, Kapila G, Hatton T, Canagasabey D, Arney J, Kazadi T, et al. Applying  
443 innovative approaches for reaching men who have sex with men and female sex workers in the  
444 Democratic Republic of Congo. *JAIDS Journal of Acquired Immune Deficiency Syndromes*.  
445 2015;68:S248-S51.
- 446 21. Lillie TA, Persaud NE, DiCarlo MC, Gashobotse D, Kamali DR, Cheron M, et al. Reaching  
447 the unreached: Performance of an enhanced peer outreach approach to identify new HIV cases  
448 among female sex workers and men who have sex with men in HIV programs in West and Central  
449 Africa. *PLoS One*. 2019;14(4):e0213743.
- 450 22. Apasa RBB, Esto; Bullock, Renee; Harlow, Siobhan; Mubagwa, Kanigula. *Understanding  
451 Vulnerable Womens' Lives in Kinshasa, DR Congo: Female Sex Workers and Agricultural  
452 Opportunities*. Bukavu, DR Congo: International Center for Advance Research and Training  
453 (ICART); 2018.
- 454 23. Manoel-Floreisse M. Congo's National Prosecutor orders crackdown on homosexuality.  
455 2024 [cited 2024 10 September]; Available from: <https://76crimes.com/2024/07/13/congo-kinshasa-alarming-crackdown-on-homosexuality-spreads-throughout-the-country/>  
456

## 458 TABLES AND FIGURE LEGENDS

459

460 Figure 1. Modified Sampling Approach for the Enrollment of MSM, Sex Workers and At-Risk Population members in Kinshasa,  
461 Kenge and Goma, DRC.

462

463 Table 1. Recruitment type by target population across all sites.

| Recruitment Type                    | MSM |      | SW  |       | MSMSW |       | ARP |      | All Respondents |      |
|-------------------------------------|-----|------|-----|-------|-------|-------|-----|------|-----------------|------|
|                                     | N   | %    | N   | %     | N     | %     | N   | %    | N               | %    |
| <b>KINSHASA, Kinshasa (n = 940)</b> |     |      |     |       |       |       |     |      |                 |      |
| Peer Educator                       | 211 | 95.1 | 297 | 99.3  | 105   | 98.1  | 248 | 79.5 | 861             | 91.6 |
| Snowball Sampling                   | 1   | 0.5  | 1   | 0.3   | 0     | 0.0   | 9   | 2.9  | 11              | 1.2  |
| Convenience Sampling at Venue       | 10  | 4.5  | 1   | 0.3   | 2     | 1.9   | 55  | 17.6 | 68              | 7.2  |
| <b>GOMA, North Kivu (n = 920)</b>   |     |      |     |       |       |       |     |      |                 |      |
| Peer Educator                       | 306 | 99.0 | 203 | 100.0 | 2     | 100.0 | 401 | 98.8 | 912             | 99.1 |
| Snowball Sampling                   | 2   | 0.7  | 0   | 0.0   | 0     | 0.0   | 0   | 0.0  | 2               | 0.2  |
| Convenience Sampling at Venue       | 1   | 0.3  | 0   | 0.0   | 0     | 0.0   | 5   | 1.2  | 6               | 0.7  |
| <b>KENGE, Kwango (n = 966)</b>      |     |      |     |       |       |       |     |      |                 |      |
| Peer Educator                       | 306 | 95.9 | 312 | 99.7  | 9     | 100.0 | 321 | 98.8 | 948             | 98.1 |
| Snowball Sampling                   | 1   | 0.3  | 1   | 0.3   | 0     | 0.0   | 0   | 0.0  | 2               | 0.2  |
| Convenience Sampling at Venue       | 12  | 3.8  | 0   | 0.0   | 0     | 0.0   | 4   | 1.2  | 16              | 1.7  |
| <b>ALL SITES (n = 2826)</b>         |     |      |     |       |       |       |     |      |                 |      |
| Peer Educator                       | 823 | 96.8 | 812 | 99.6  | 116   | 98.3  | 970 | 93.0 | 2721            | 96.3 |

|                               |    |     |   |     |   |     |    |     |    |     |
|-------------------------------|----|-----|---|-----|---|-----|----|-----|----|-----|
| Snowball Sampling             | 4  | 0.5 | 2 | 0.3 | 0 | 0.0 | 9  | 0.9 | 15 | 0.5 |
| Convenience Sampling at Venue | 23 | 2.7 | 1 | 0.1 | 2 | 1.7 | 64 | 6.1 | 90 | 3.2 |

464

465

466 **Table 2. Demographic Characteristics of Urban populations sampled (n = 2826).**

| <b>Sample characteristic<sup>1</sup> (n = 2826)</b> | <b>KINSHASA,<br/>Kinshasa<br/>n = 940</b> |         | <b>GOMA, North Kivu<br/>n = 920</b> |         | <b>KENGE, Kwango<br/>n = 966</b> |         |
|-----------------------------------------------------|-------------------------------------------|---------|-------------------------------------|---------|----------------------------------|---------|
| <b>Demographics</b>                                 |                                           |         |                                     |         |                                  |         |
| Age (median, interquartile range)                   | 27                                        | [23-35] | 24                                  | [20-29] | 30                               | [25-36] |
| Age (mean, standard deviation)                      | 29.4                                      | 9.2     | 25.5                                | 7.4     | 30.8                             | 7.4     |
| <b>Age Category</b>                                 |                                           |         |                                     |         |                                  |         |
| 18-24                                               | 363                                       | 38.6    | 513                                 | 55.8    | 217                              | 22.5    |
| 25-34                                               | 335                                       | 35.6    | 311                                 | 33.8    | 475                              | 49.2    |
| 35-44                                               | 171                                       | 18.2    | 77                                  | 8.4     | 236                              | 24.4    |
| 45-54                                               | 51                                        | 5.4     | 13                                  | 1.4     | 35                               | 3.6     |
| 55-64                                               | 17                                        | 1.8     | 3                                   | 0.3     | 3                                | 0.3     |
| 65+                                                 | 3                                         | 0.3     | 3                                   | 0.3     | 0                                | 0.0     |
| <b>Sex at Birth</b>                                 |                                           |         |                                     |         |                                  |         |
| Male                                                | 502                                       | 53.4    | 532                                 | 57.8    | 508                              | 52.6    |
| Female                                              | 438                                       | 46.6    | 388                                 | 42.2    | 458                              | 47.4    |

|                                                  |     |      |     |      |     |      |
|--------------------------------------------------|-----|------|-----|------|-----|------|
| Population of Interest                           |     |      |     |      |     |      |
| Men who have sex with Men (MSM)                  | 222 | 23.6 | 309 | 33.6 | 319 | 33.0 |
| Sex Worker (primary or secondary occupation, SW) | 299 | 31.8 | 203 | 22.1 | 313 | 32.4 |
| MSM and Sex Worker                               | 107 | 11.4 | 2   | 0.2  | 9   | 0.9  |
| At-Risk Population (ARP)                         | 312 | 33.2 | 406 | 44.1 | 325 | 33.6 |
| Civil Status ( <i>3 missing</i> )                |     |      |     |      |     |      |
| Single                                           | 797 | 84.8 | 781 | 84.9 | 642 | 66.5 |
| Married                                          | 63  | 6.7  | 116 | 12.6 | 272 | 28.2 |
| Living together as married                       | 52  | 5.5  | 1   | 0.1  | 1   | 0.1  |
| Divorced or Separated                            | 14  | 1.5  | 17  | 1.9  | 43  | 4.5  |
| Widowed                                          | 12  | 1.3  | 5   | 0.5  | 7   | 0.7  |
| Education Level                                  |     |      |     |      |     |      |
| None                                             | 23  | 2.5  | 21  | 2.3  | 103 | 10.7 |
| Started Primary School                           | 40  | 4.3  | 35  | 3.8  | 32  | 3.3  |
| Finished Primary School                          | 313 | 33.3 | 271 | 29.5 | 204 | 21.1 |
| Finished Secondary School                        | 40  | 42.7 | 326 | 35.4 | 462 | 47.8 |
| Apprentice                                       | 6   | 0.6  | 8   | 0.9  | 26  | 2.7  |
| College/University                               | 138 | 14.7 | 206 | 22.4 | 133 | 13.8 |
| Graduate school                                  | 19  | 2.0  | 53  | 5.8  | 6   | 0.6  |

<sup>1</sup>Reported as n (%) unless otherwise noted.

467

468 **Table 3. Intersection of self-reported gender and sexual orientation of respondents dichotomized by sex at birth.**

469

| <u>Sex at Birth</u> | <u>Gender</u> | <u>Sexual Orientation**</u> | <u>TOTAL</u> |
|---------------------|---------------|-----------------------------|--------------|
|---------------------|---------------|-----------------------------|--------------|

|               |                                                            | Straight           | Gay               | Bisexual          | Neutral        |                |
|---------------|------------------------------------------------------------|--------------------|-------------------|-------------------|----------------|----------------|
|               | Male/Man                                                   | 627 (40.7)         | 195 (12.7)        | 156 (10.1)        | 1 (0.1)        | 979 (63.6)     |
|               | * Male/Man AND<br>Female/Woman                             | -                  | 16 (1.0)          | 32 (3.1)          | -              | 48 (3.1)       |
|               | * Male/Man AND<br>Transgender male                         | -                  | 1 (0.1)           | 1 (0.1)           | -              | 2 (0.1)        |
|               | Male/Man AND<br>Transgender female                         | -                  | 2 (0.1)           | 1 (0.1)           | -              | 3 (0.2)        |
|               | * Female Woman                                             | 10 (0.7)           | 114 (7.4)         | 38 (2.5)          | -              | 162 (10.5)     |
|               | * Female/Woman AND<br>Transgender male                     | -                  | 3 (0.2)           | -                 | -              | 3 (0.2)        |
| <b>Male</b>   | * Transgender male/man                                     | 1 (0.1)            | 36 (2.3)          | 17 (1.1)          | -              | 54 (3.5)       |
|               | * Transgender male/man<br>AND Transgender female           | -                  | 3 (0.2)           | 1 (0.1)           | -              | 4 (0.3)        |
|               | Transgender female/woman                                   | 10 (0.7)           | 235 (15.3)        | 38 (2.5)          | -              | 283 (18.4)     |
|               | Non-Binary/Gender Fluid                                    | -                  | 1 (0.1)           | -                 | -              | 1 (0.1)        |
|               | Transgender female/woman<br>AND Non-Binary/Gender<br>Fluid | -                  | 1 (0.1)           | -                 | -              | 1 (0.1)        |
|               | <b>TOTAL (2 missing)</b>                                   | <b>648 (42.1)</b>  | <b>607 (39.4)</b> | <b>284 (18.4)</b> | <b>1 (0.1)</b> | <b>1540</b>    |
|               | * Male/Man                                                 | 14 (1.1)           | -                 | 1 (0.1)           | -              | 15 (1.2)       |
|               | Female/Woman                                               | 1251 (97.6)        | 1 (0.1)           | 13 (1.6)          | -              | 1265<br>(98.7) |
| <b>Female</b> | Female/Woman AND<br>Transgender male                       | -                  | -                 | 1 (0.1)           | -              | 1 (0.1)        |
|               | * Transgender female/woman                                 | -                  | -                 | 1 (0.1)           | -              | 1 (0.1)        |
|               | <b>TOTAL (2 missing)</b>                                   | <b>1265 (98.7)</b> | <b>1 (0.1)</b>    | <b>16 (1.3)</b>   | -              | <b>1282</b>    |

\* Indicates Sex\*Gender responses which were incompatible with current definitions

\*\* Reported as N (%), where percentage is of total sex-at-birth

470

471

472

473 **Table 4. Site Type of participant enrollment by Urban Center Location.**

| Location | Site Type* |          |            |                   |                 |            |
|----------|------------|----------|------------|-------------------|-----------------|------------|
|          | Farm       | Abattoir | Bar/Club   | Private Residence | Health Facility | Other      |
| Kinshasa | -          | 1 (0.1)  | 525 (55.9) | 104 (11.1)        | 302 (32.1)      | 8 (0.9)    |
| Goma     | 3 (0.3)    | 44(4.8)  | 37 (4.0)   | 13 (1.4)          | 6 (0.7)         | 817 (88.8) |
| Kenge    | -          | -        | 19 (2.0)   | 7 (0.7)           | 937 (97.0)      | 3 (0.3)    |

\*Presented as N (%)

474

475 **Table 5. Likelihood of Sampling Target Populations by Site Type in Kinshasa.** Farm/Animal venue types were excluded from the

476 Kinshasa-only model due to low cell counts.

| Site Type                 | N   | %    | MSM (n = 222) |               |         | SW (n = 299) |               |         | MSMSW (n = 107) |               |         | ARP (n = 312) |               |         |
|---------------------------|-----|------|---------------|---------------|---------|--------------|---------------|---------|-----------------|---------------|---------|---------------|---------------|---------|
|                           |     |      | Odds Ratio    | 95% CI        | p-value | Odds Ratio   | 95% CI        | p-value | Odds Ratio      | 95% CI        | p-value | Odds Ratio    | 95% CI        | p-value |
| <b>KINSHASA, Kinshasa</b> |     |      |               |               |         |              |               |         |                 |               |         |               |               |         |
| Health Facility           | 302 | 32.2 | REF           |               |         | REF          |               |         | REF             |               |         | REF           |               |         |
| Bar/Club                  | 525 | 55.9 | 0.57          | [0.41, 0.79]  | <0.01   | 2.81         | [2.01, 3.92]  | <0.01   | 0.40            | [0.27, 0.61]  | <0.01   | 1.10          | [0.74, 1.38]  | 0.93    |
| Private Residence         | 104 | 11.1 | 0.30          | [0.16, 0.57]  | <0.01   | 1.79         | [1.07, 2.97]  | 0.03    | 0.17            | [0.06, 0.49]  | <0.01   | 2.75          | [1.74, 4.34]  | <0.01   |
| Other                     | 8   | 0.9  | <0.01         | [<0.01, >999] | 0.98    | <0.01        | [<0.01, >999] | 0.98    | <0.01           | [<0.01, >999] | 0.98    | >999.99       | [<0.01, >999] | 0.98    |
| Farm/Animal Care Venue    | 1   | 0.1  | -             |               | -       | -            |               | -       | -               |               | -       | -             |               | -       |

477

478

479

480

481

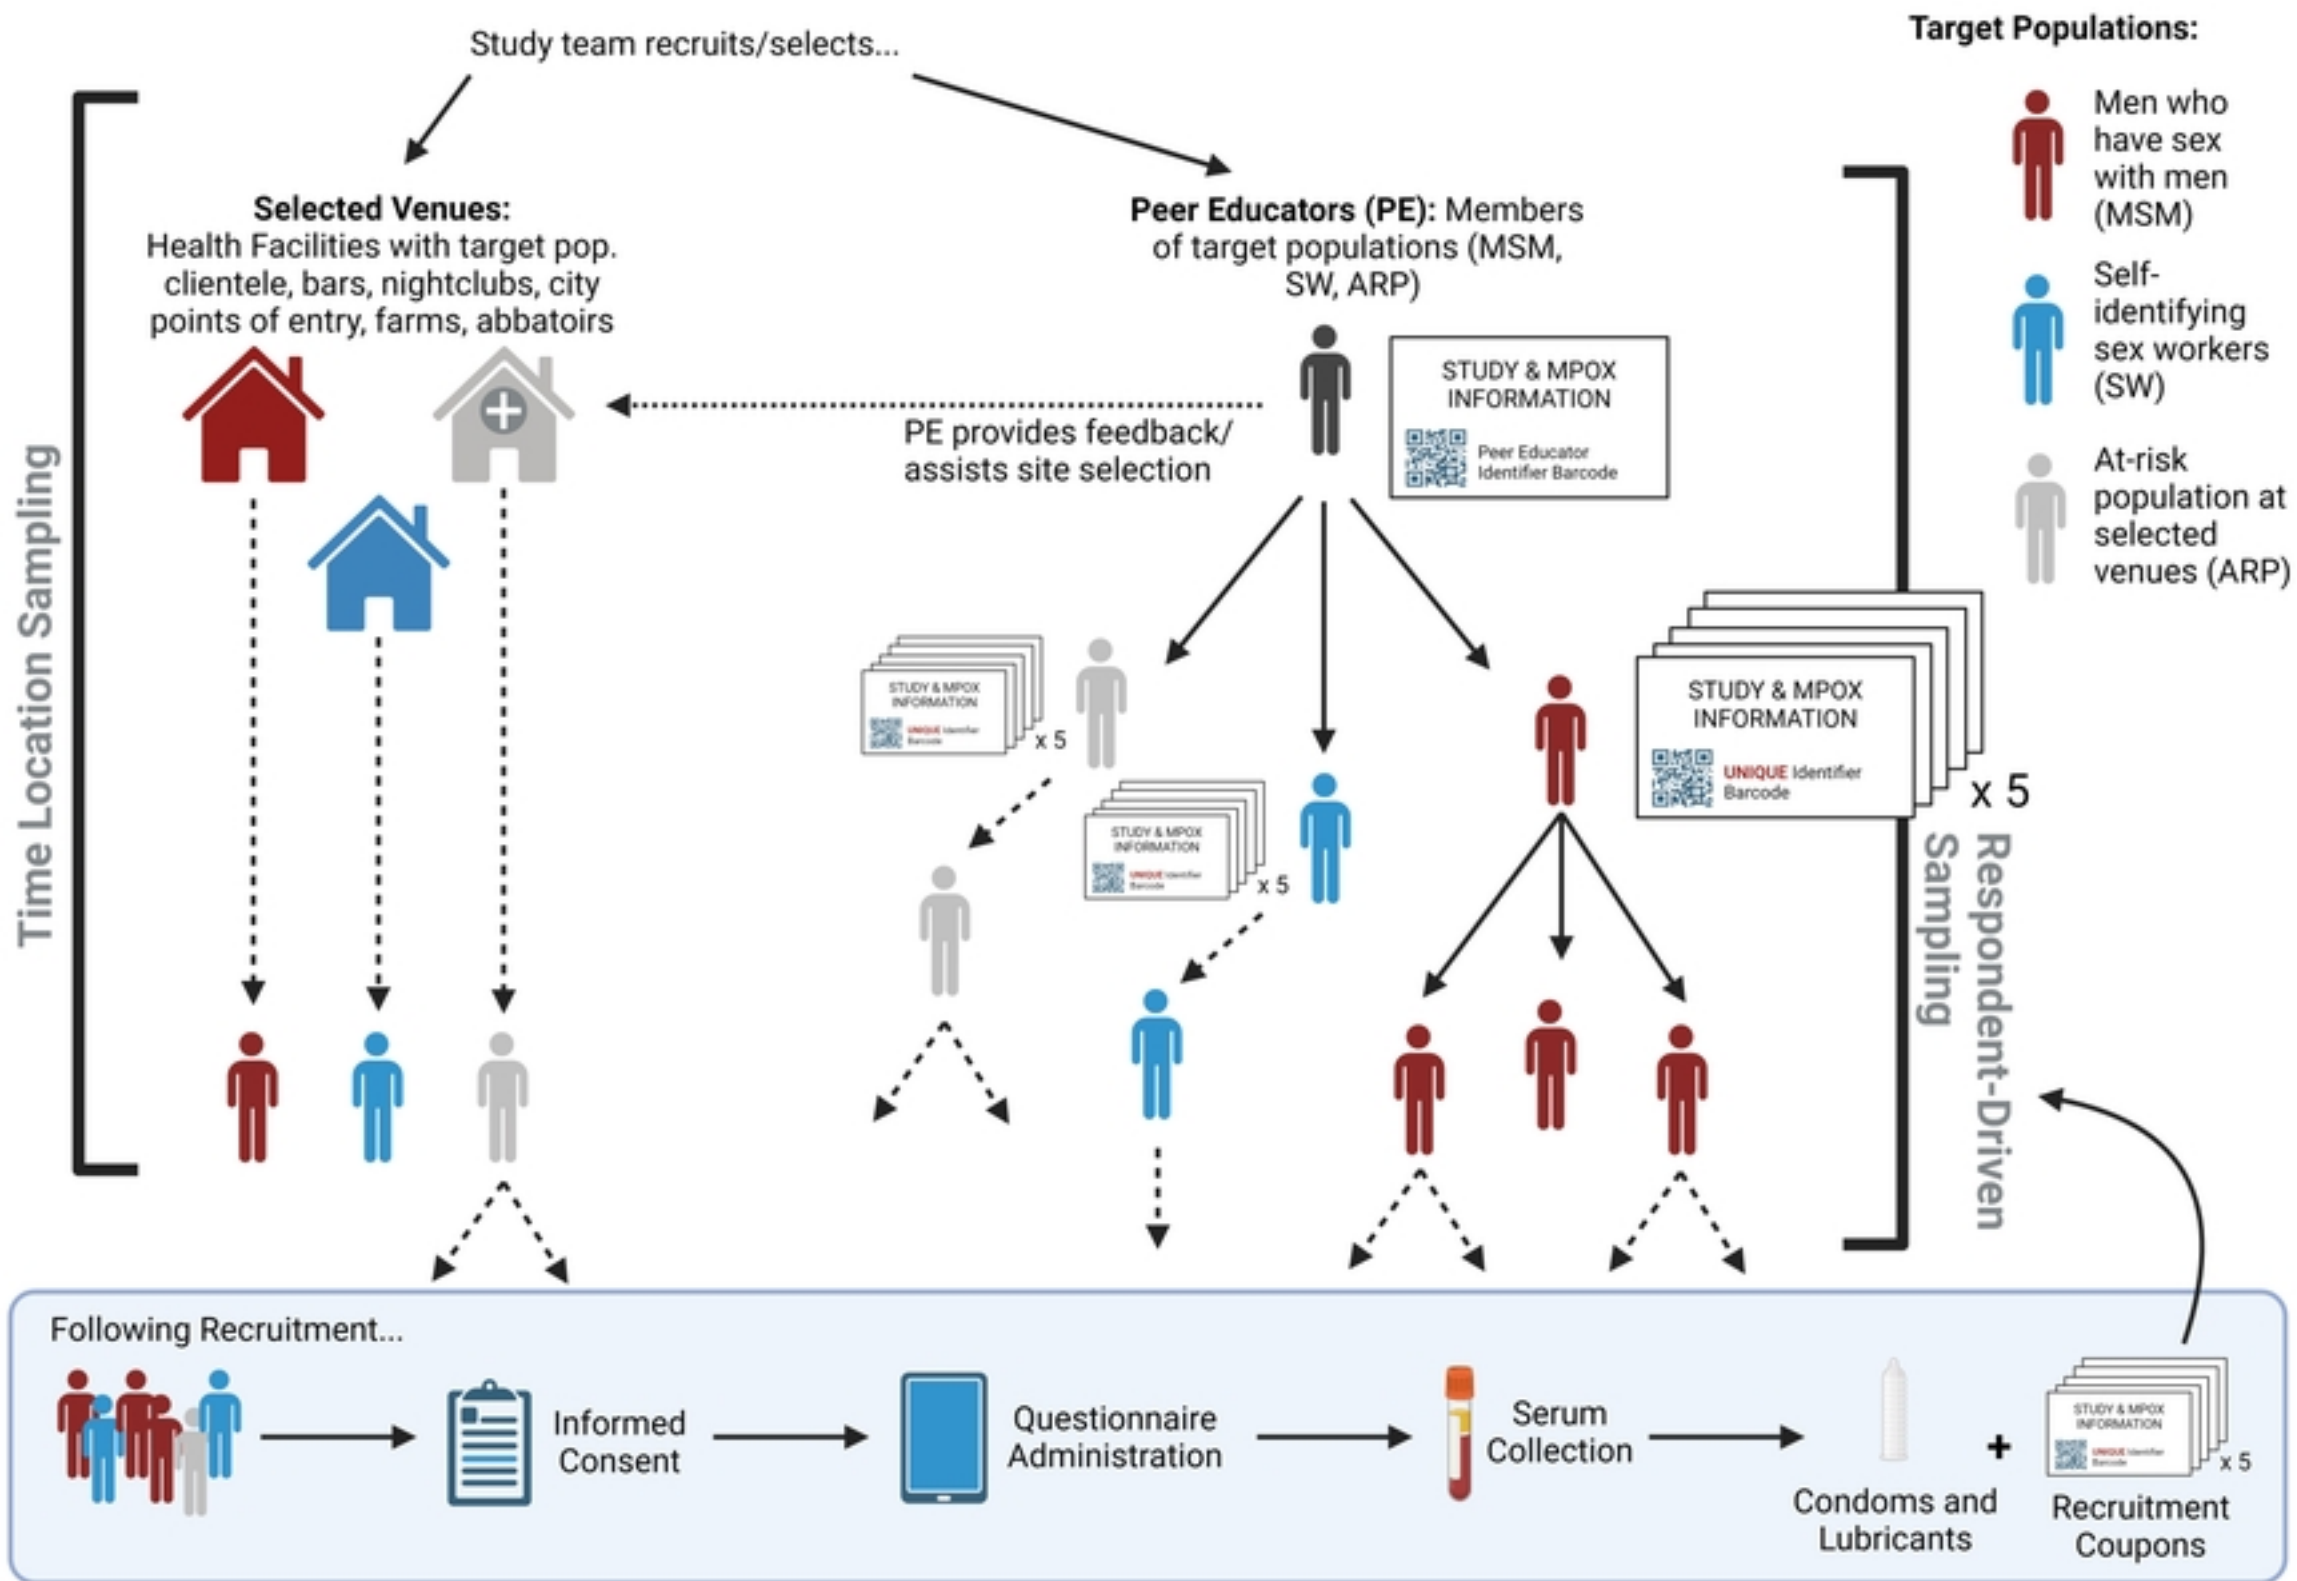

Figure
